# Supplementary material
Source: ML conference proceedings conference paper supplement (https://openaccess.thecvf.com/content/ICCV_2017/html/Tewari_MoFA_Model-Based_Deep_ICCV_2017_paper.html)
Supplement: Supplementary file 1 [file Tewari_MoFA_Model-Based_Deep_ICCV_2017_supplemental.pdf]

Archive with 2 entries (2 files):
- supplemental.pdf
- video.mp4
